# Supplementary material for: Genomic Insight Into the Population Structure and Admixture History of Tai-Kadai-Speaking Sui People in Southwest China
Source: PubMed Central journal article supplement (PMC8489805; doi:10.3389/fgene.2021.735084), 2021-09-20

(A)

Genetic Relationship Matrix (GRM) based on raw data

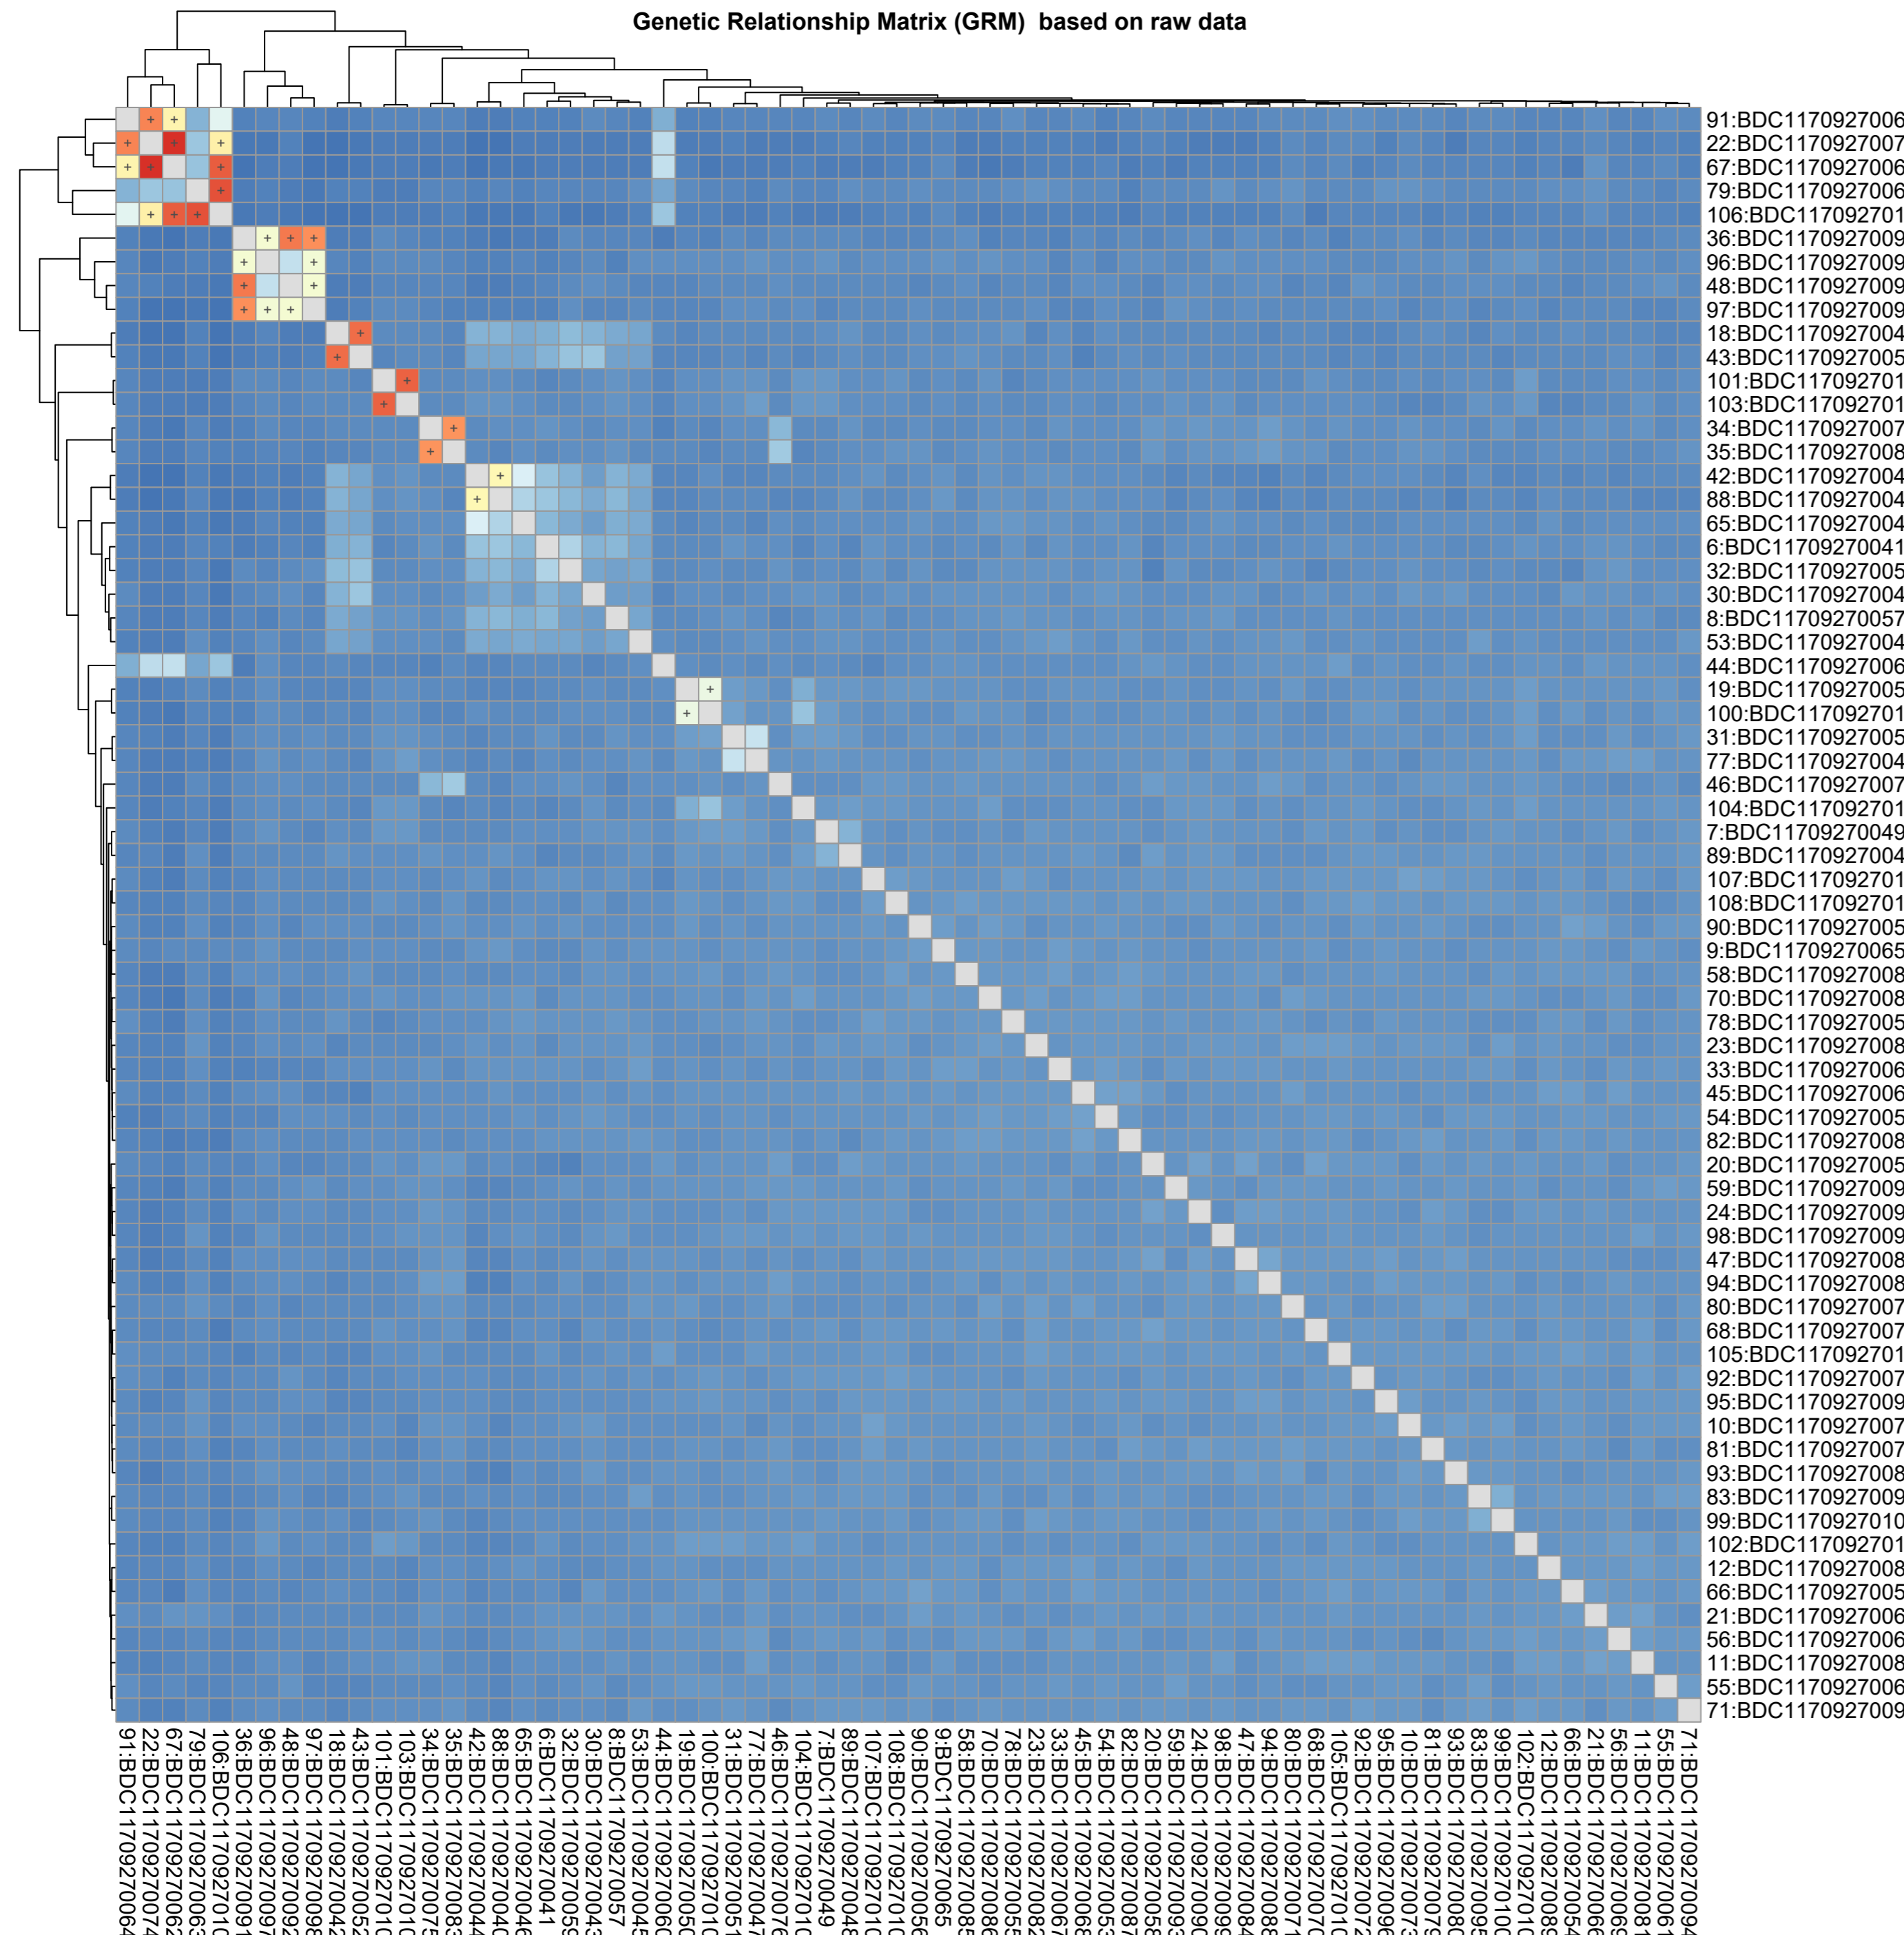

(B)

Genetic Relationship Matrix (GRM) based on the removed kinship data

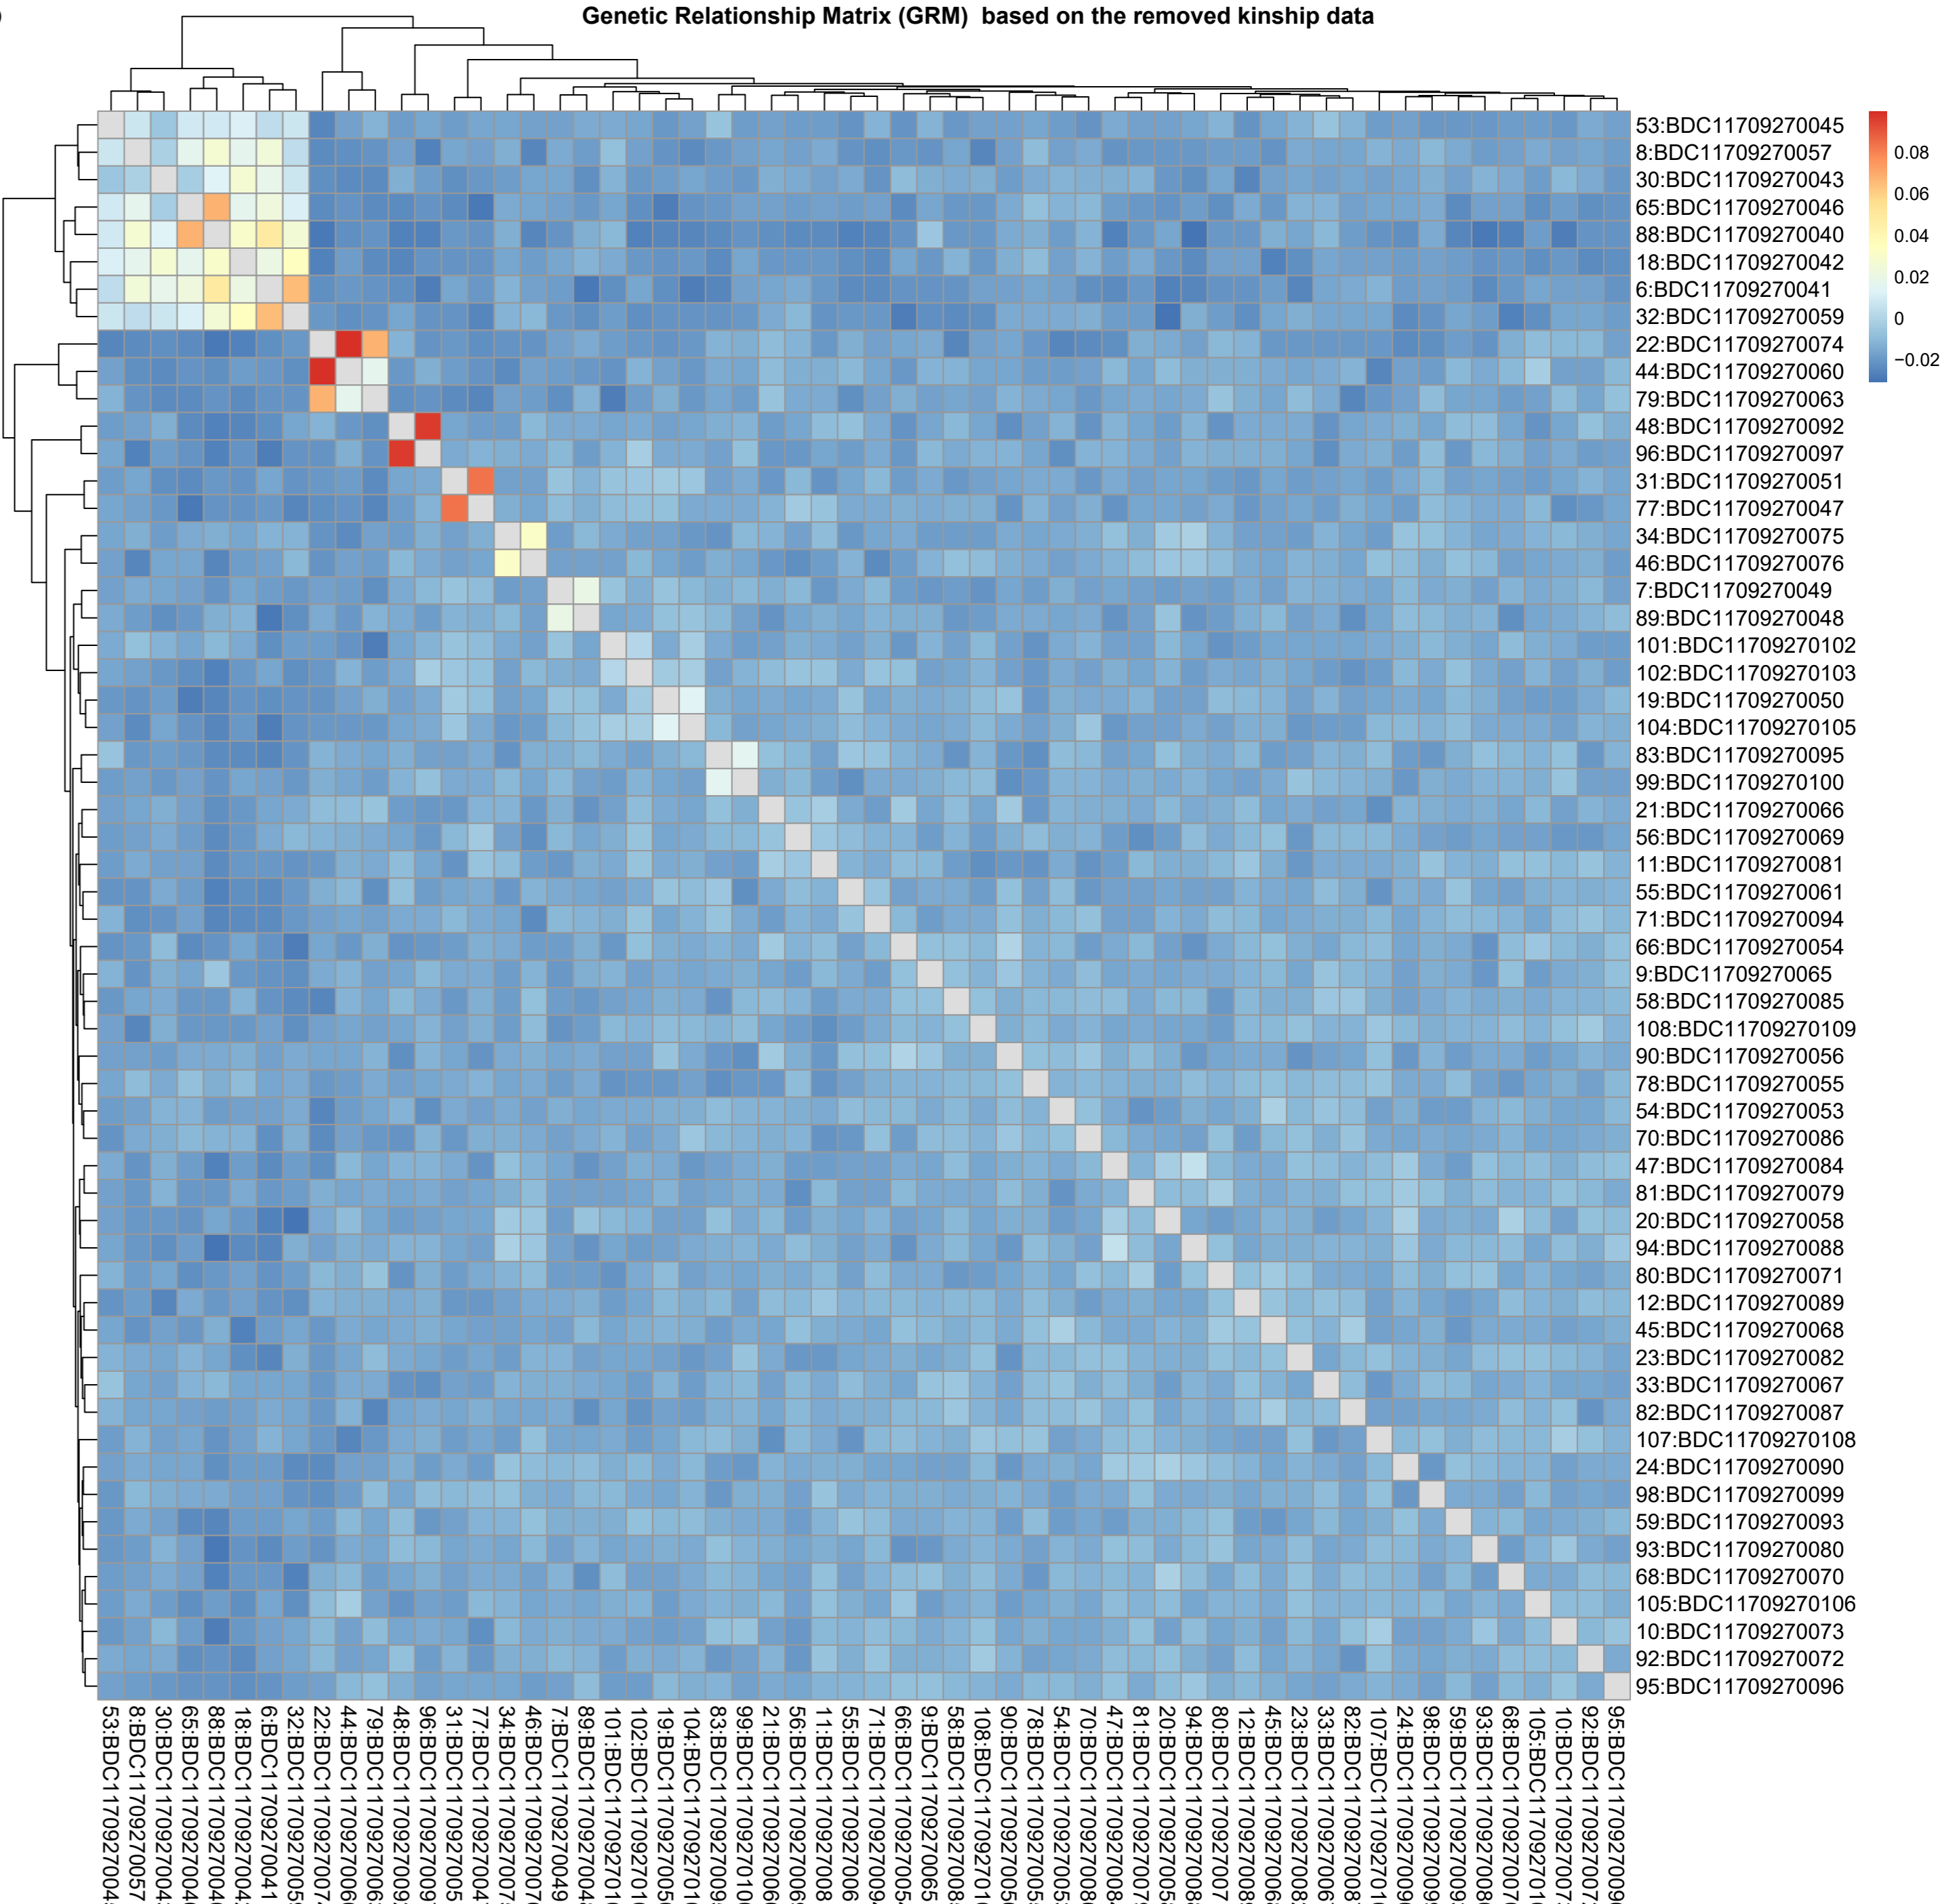

Supplement: Data_Sheet_1.pdf [file Data_Sheet_1.pdf]
