# Supplementary material for: Genomic Insight Into the Population Structure and Admixture History of Tai-Kadai-Speaking Sui People in Southwest China
Source: PubMed Central journal article supplement (PMC8489805; doi:10.3389/fgene.2021.735084), 2021-09-20

qpWave rank=0, dropping Mbuti

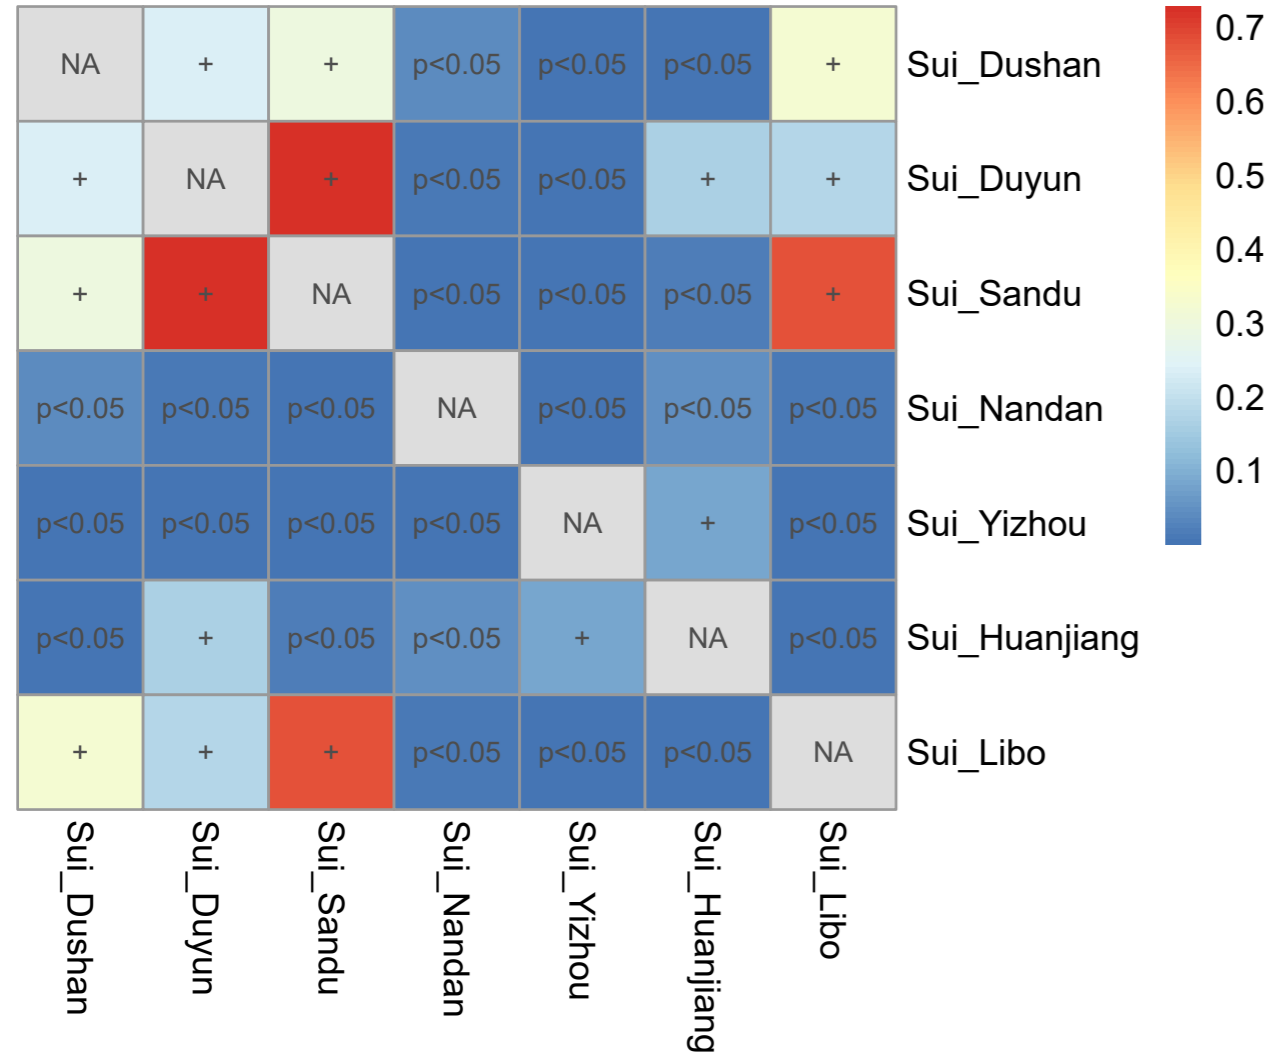

qpWave rank=0, dropping Mongolia\_N\_East

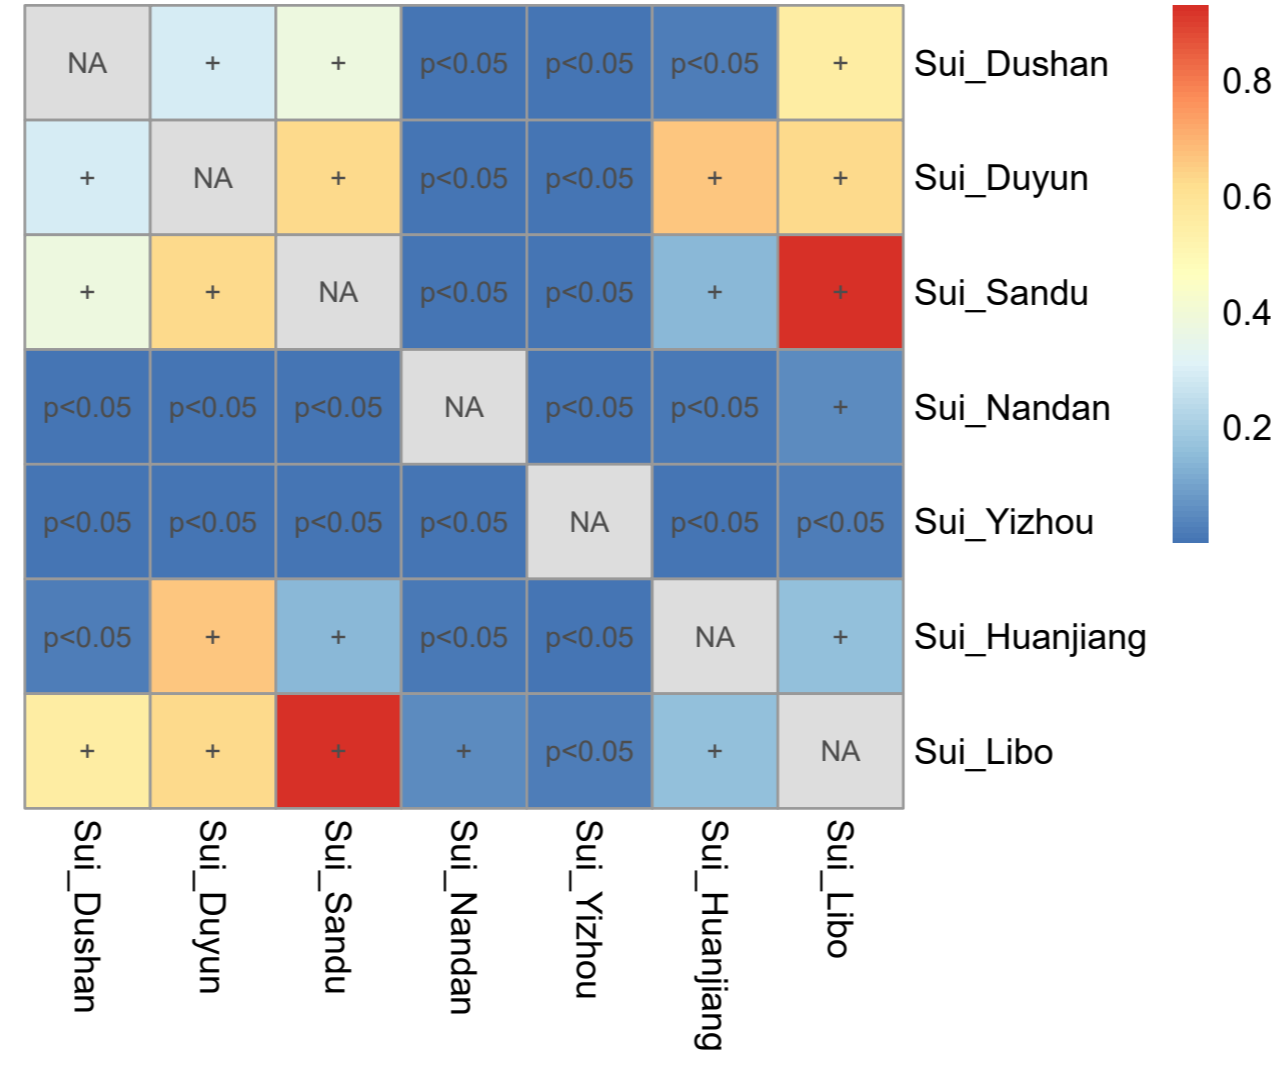

qpWave rank=0, dropping DevilsCave\_N

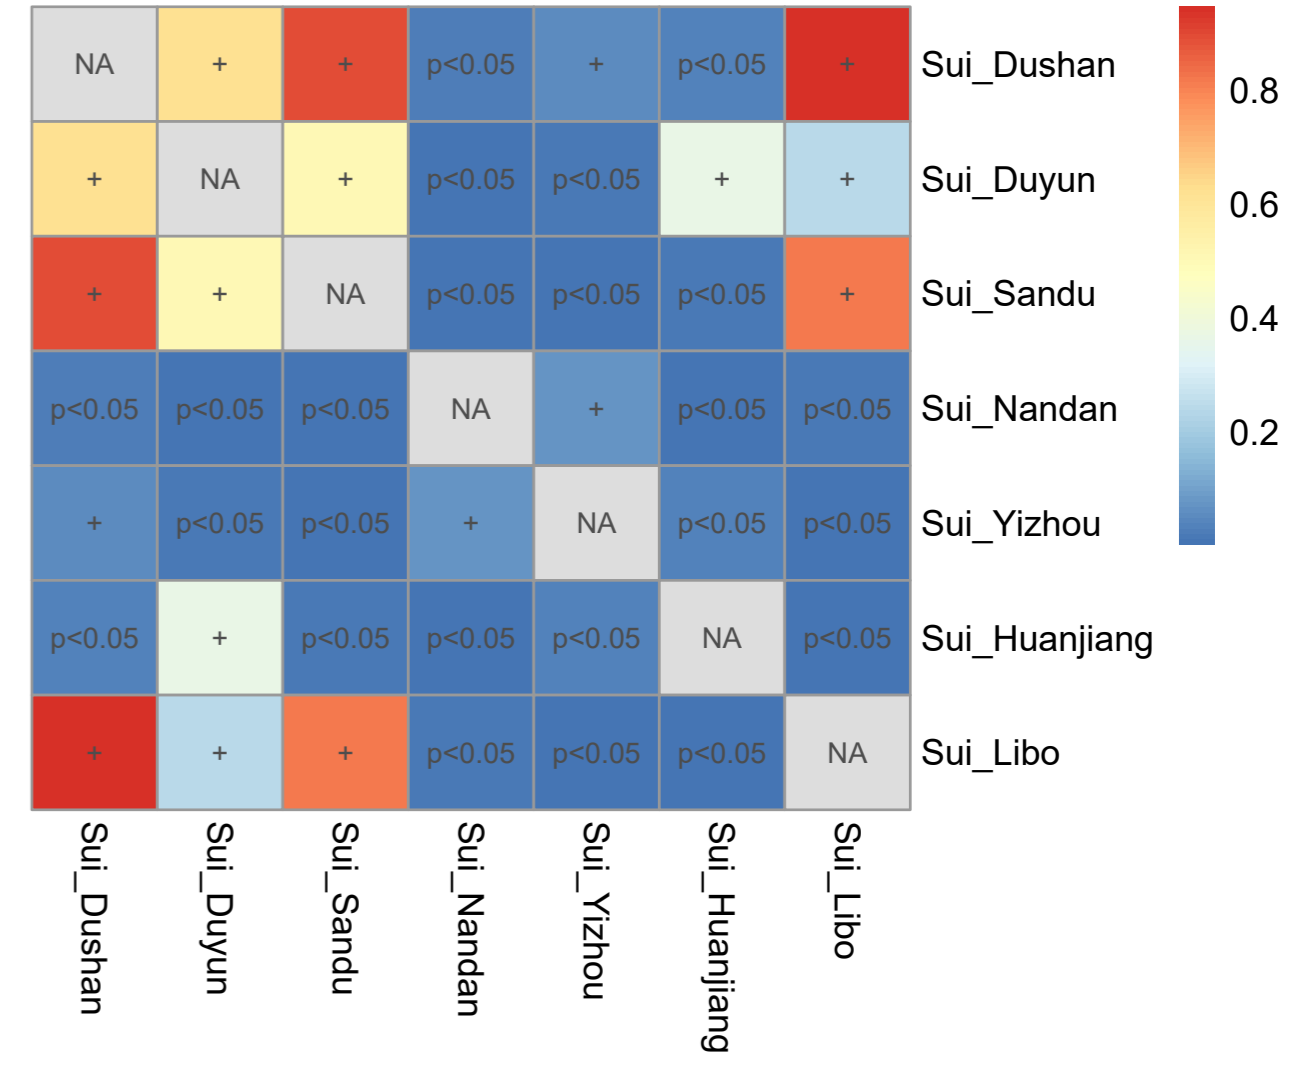

qpWave rank=0, dropping Ami

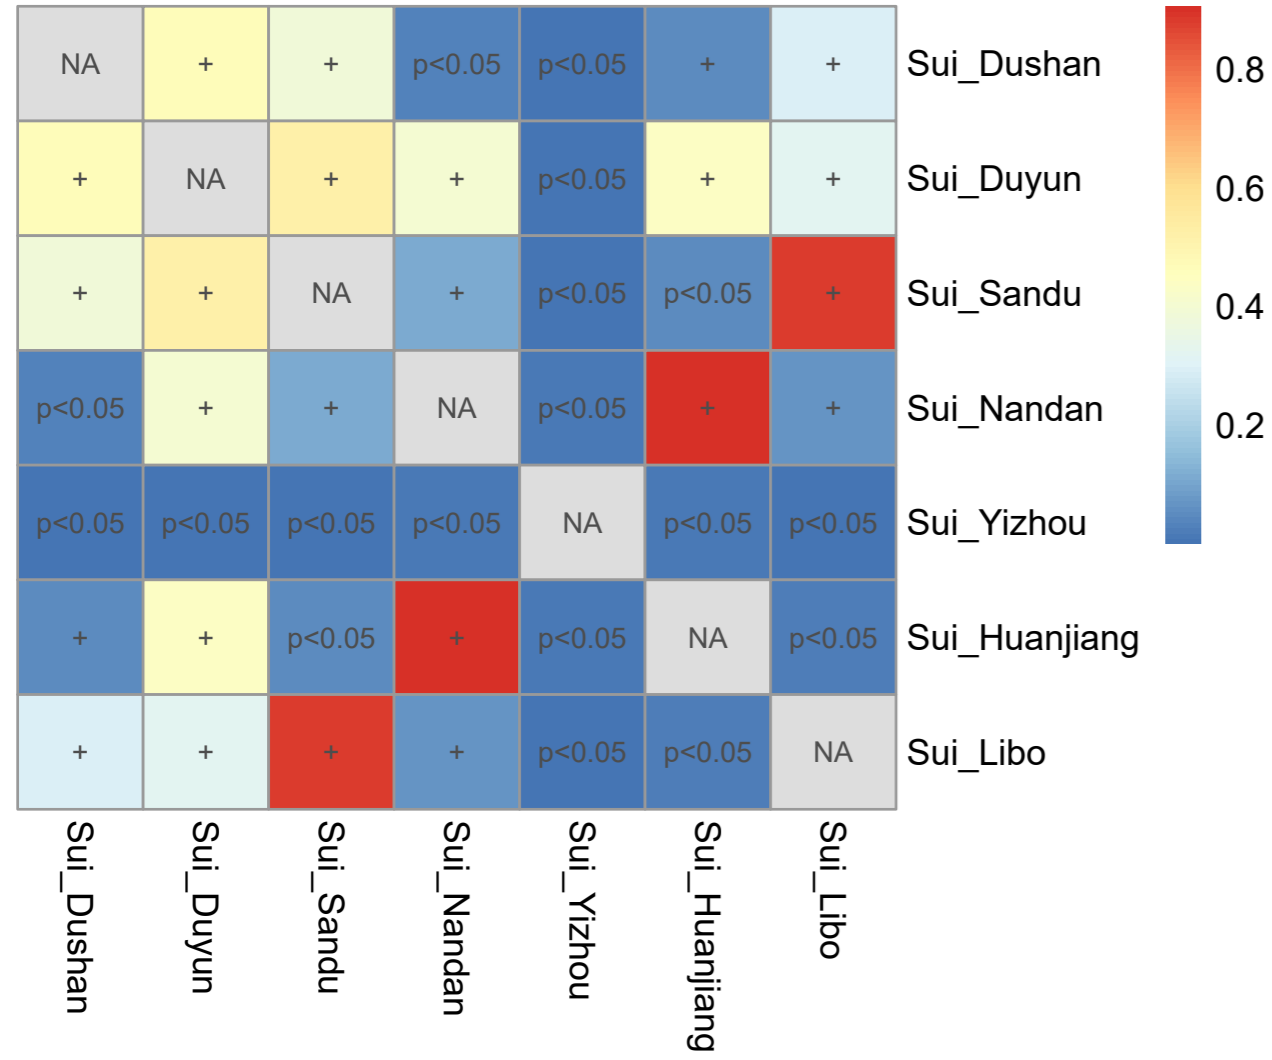

qpWave rank=0, dropping Liangdao2

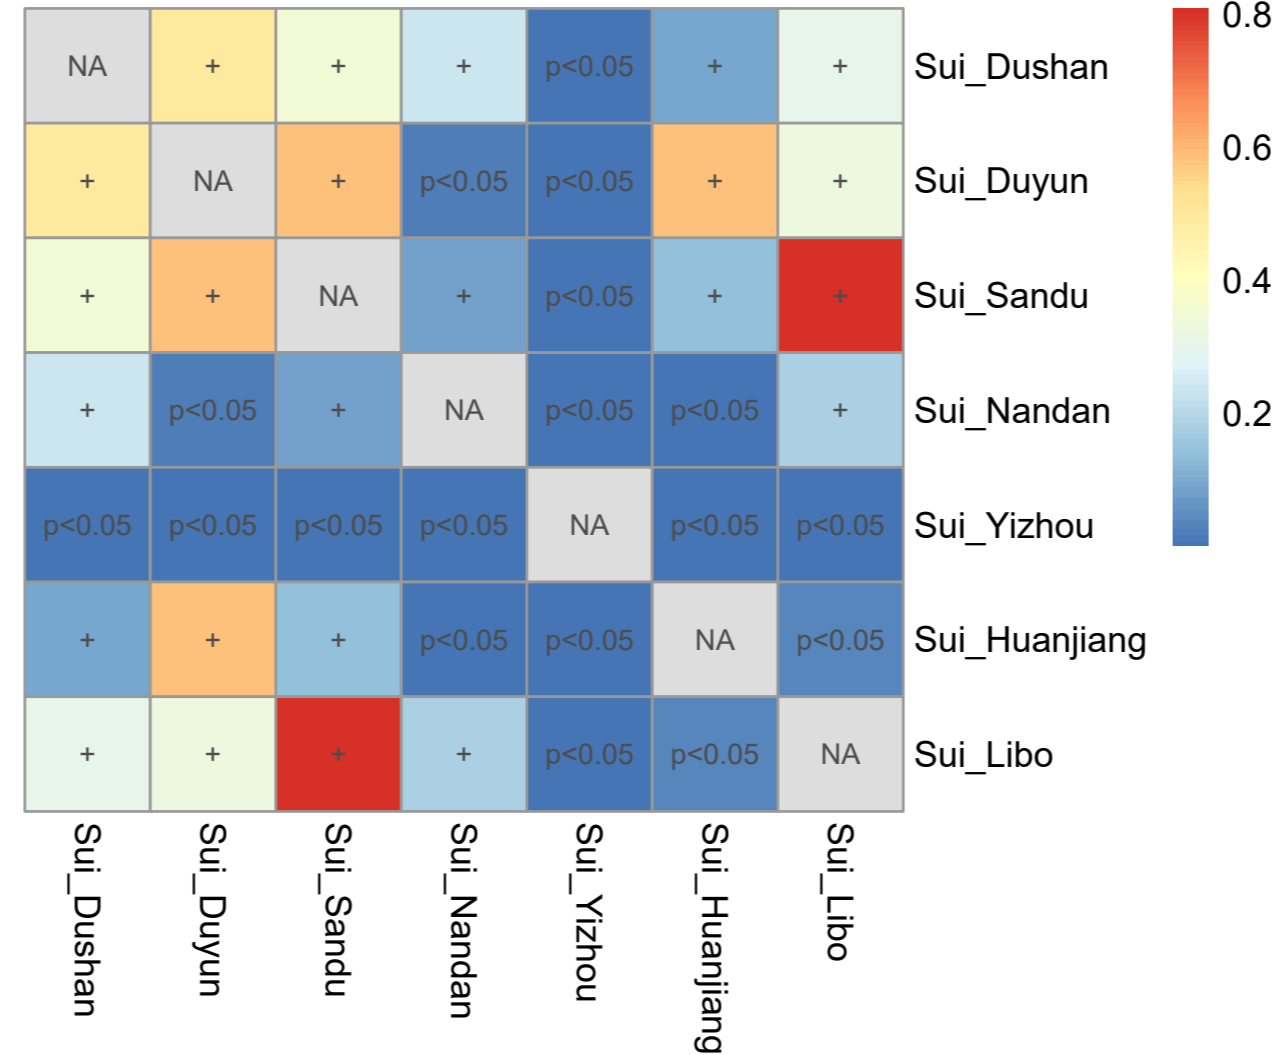

qpWave rank=0, dropping Vietnam\_LN

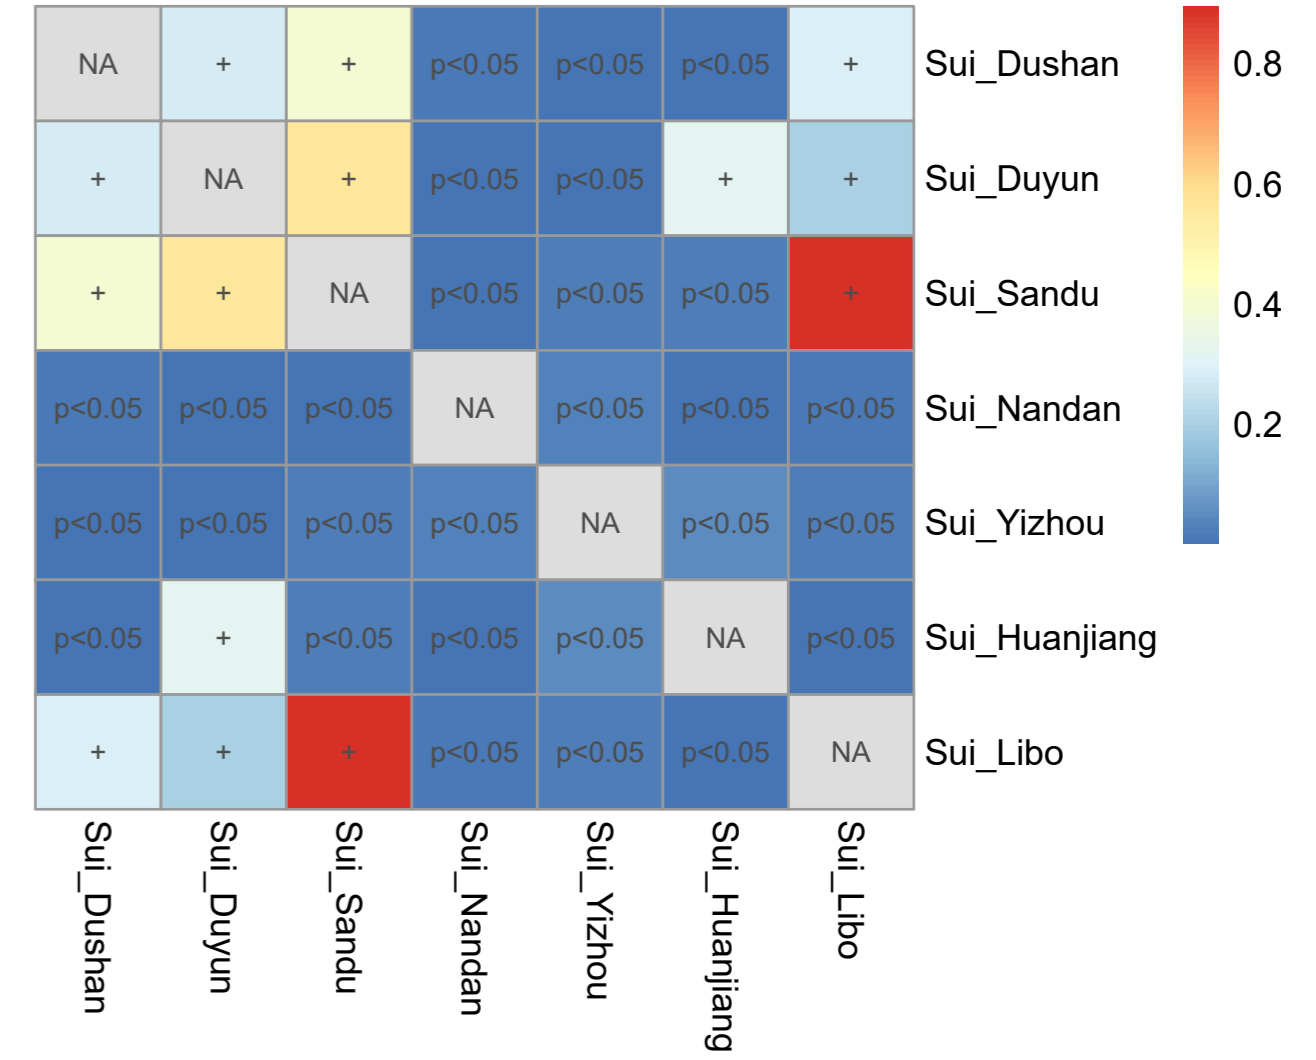

Supplement: Data_Sheet_4.pdf [file Data_Sheet_4.pdf]
